# Supplementary material for: Architecture of dual emissive three-dimensional nanostructure composites containing graphitic 2D sheets and iron oxide nanoparticles: detection of short single-stranded DNA sequences
Source: Royal Society of Chemistry journal article supplement (doi:10.1039/d2bm02097a), 2023-01-01
Supplement: d2bm02097a1.pdf [file d2bm02097a1.pdf]

## Architecture of Dual Emissive Three Dimensional Nanostructures Composite Containing Graphitic 2D Sheets and Iron Oxide Nanoparticles: Detecting Short Single-Stranded DNA Sequences

Nargish Parvin, Tapas K. Mandal\* and Sang Woo Joo\*

School of Mechanical Engineering, Yeungnam University, Gyeongsan 38541, Republic of  
Korea

\*Corresponding Author: [swjool@gmail.com](mailto:swjool@gmail.com) (S.W.J.); [tps.mndl@gmail.com](mailto:tps.mndl@gmail.com) (T.K.M);  
[nargish.parvin@gmail.com](mailto:nargish.parvin@gmail.com) (N.P.)

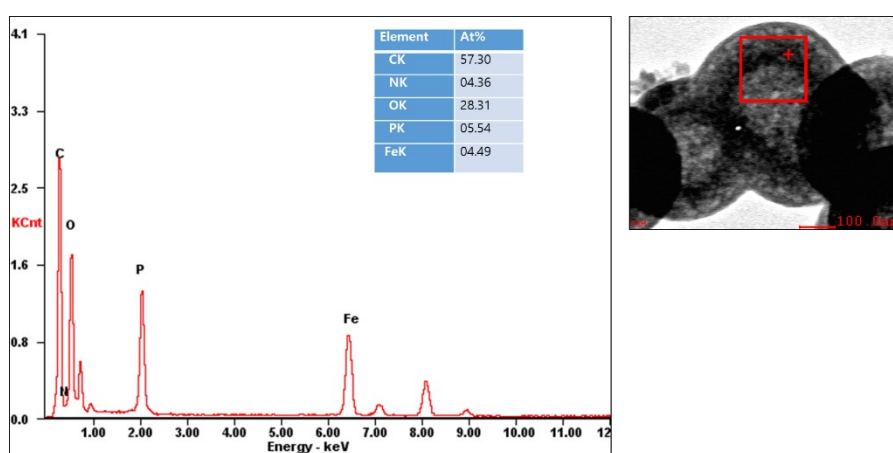

**Figure S1.** Energy dispersive X-ray analysis (EDX) spectrum of 3D nanostructure composite of 5<sup>th</sup> cycle. In inset elements and their atomic percentage table. Corresponding TEM image, from where area scan done during EDX, (red square area).

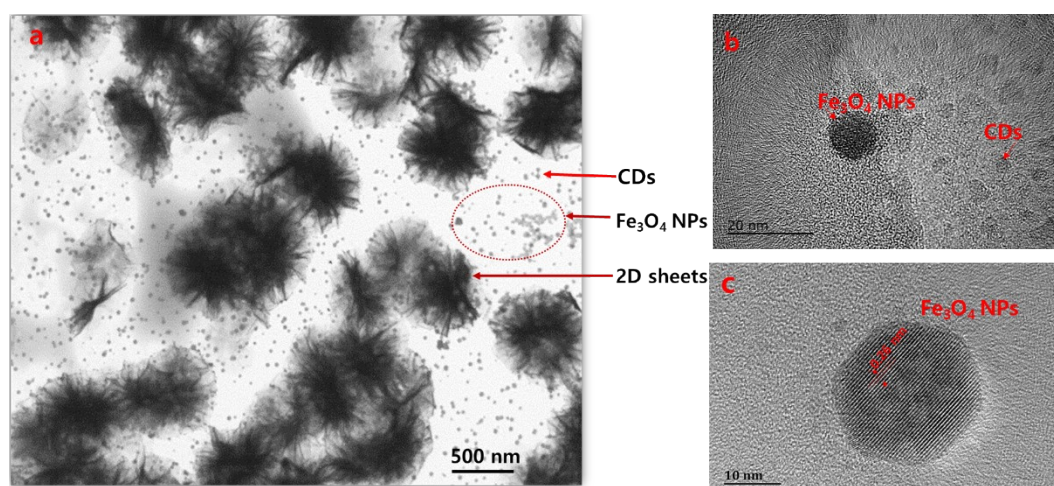

**Figure S2.** (a), The TEM image of after the 1<sup>st</sup> cycle's produced materials. (b) HRTEM of the 1<sup>st</sup> cycle's produced materials where amorphous carbon dots (CDs) and crystalline Fe<sub>3</sub>O<sub>4</sub> nanoparticles (NPs) presence. (c) Lattice pattern of Fe<sub>3</sub>O<sub>4</sub> nanoparticles.

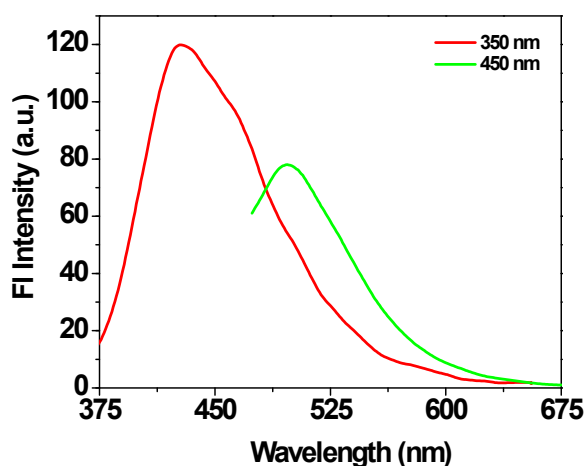

**Figure S3.** Fluorescence spectra of blank 3D nanostructure composite (without ssDNA probe) at the 350 nm and 450 nm excitation wavelength.

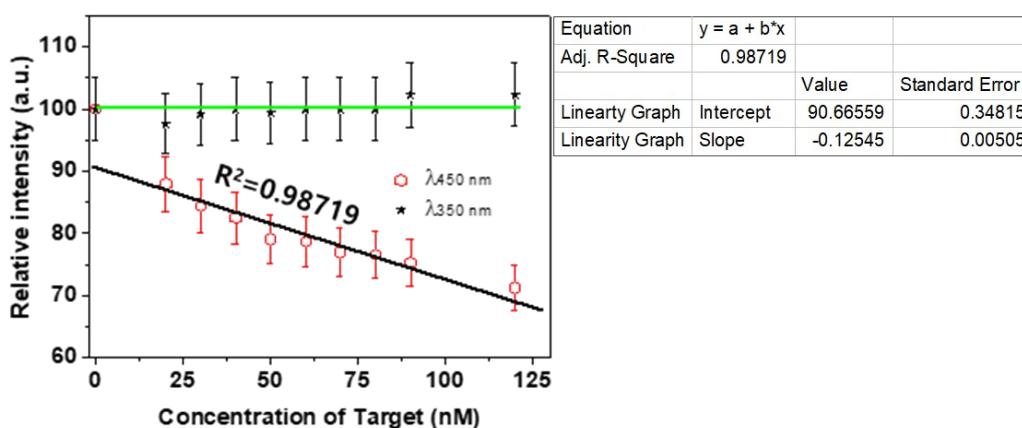

**Figure S4.** Linearity curve of target DNA detection with the presence of 3D nanostructure. The excitation wavelength is 450 nm, and the monitored emission wavelength is 500 nm. The detection limit of T (Sudan Ebola Virus DNA in this study) using 3D nanostructure nano sensor is determined from the following equation:  $LOD = K \times SD/S$ , where  $K = 3$ ,  $SD$  is the standard deviation of the blank solution, and  $S$  is the slope of the calibration curve.  $LOD = K \times SD/S = 3 \times 0.02 / 0.12545 \text{ nM} = 0.47 \times 10^{-9} \text{ M}$  (therefore, finally limit of detection=0.47 nM).

**Table S1.** Peak table of different cycles of 3D nanostructures materials atomic percentages is provided

|                 | 1 <sup>st</sup> Cycle | 2 <sup>nd</sup> Cycle | 3 <sup>rd</sup> Cycle | 4 <sup>th</sup> Cycle | 5 <sup>th</sup> Cycle |
|-----------------|-----------------------|-----------------------|-----------------------|-----------------------|-----------------------|
| <b>Fe2p (%)</b> | 0.8                   | 1.01                  | 1.62                  | 1.72                  | 1.84                  |
| <b>O1s (%)</b>  | 33.76                 | 30.85                 | 24.98                 | 24.11                 | 28.99                 |
| <b>N1s (%)</b>  | 6.66                  | 4.64                  | 3.6                   | 4.18                  | 5.54                  |
| <b>C1s (%)</b>  | 50.04                 | 54.89                 | 62.37                 | 62.26                 | 56.18                 |
| <b>P2p (%)</b>  | 8.75                  | 7.95                  | 5.67                  | 6.3                   | 7.45                  |

**Table S2.** The empirical DNA sequences are summarizes.

**Name Sequence 5' to 3'**

|                                          |                                                      |
|------------------------------------------|------------------------------------------------------|
| ssDNA or (P)                             | GCATTAGCTTCCGTTCTCTC                                 |
| SudZai Ebola virus DNA or Target DNA (T) | GAGACAACGGAAGCTAATGC                                 |
| Single base mismatch DNA or (SM)         | GAGACAACGG <b>G</b> AGCTAATGC                        |
| Random DNA or (R)                        | <u>AAGAT</u> <u>ACCGG</u> <u>I</u> AGCCAAT <u>CC</u> |

\* The mutation base is indicated by underline and **bold**
